# Supplementary material
Source: HighWire-hosted journal article supplement (https://bmjopen.bmj.com/content/14/11/e088163)

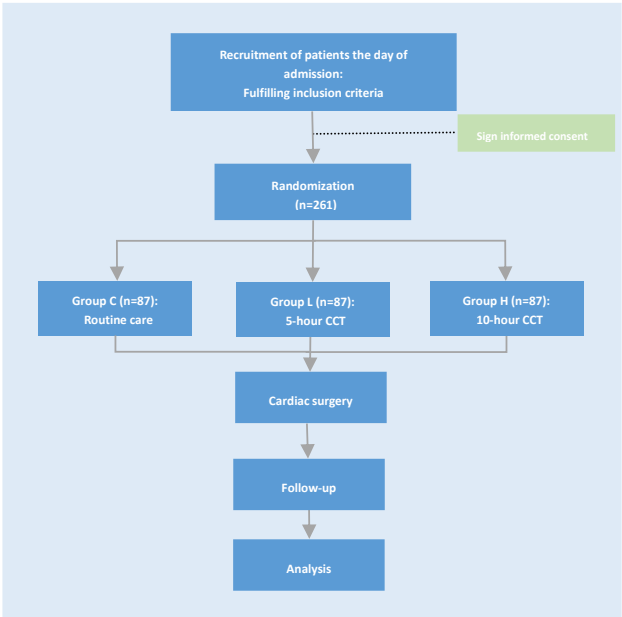

Figure 1 Flow chart of this RCT.

Supplement: inline-supplementary-material-1 [file inline-supplementary-material-1.pdf]
